# Supplementary material for: Iodine-Modified Ag NPs for Highly Sensitive SERS Detection of Deltamethrin Residues on Surfaces
Source: MDPI journal article supplement (doi:10.3390/molecules28041700), 2023-02-10
Supplement: s1 [file s1]

# Iodine-Modified Ag NPs for Highly Sensitive SERS Detection of Deltamethrin Residues on Surfaces

Zhangmei Hu <sup>1</sup>, Dandan Peng<sup>2</sup>, Feiyue Xing <sup>2</sup>, Xiang Wen <sup>2</sup>, Kun Xie <sup>3</sup>, Xuemei Xu <sup>4</sup>, Hui Zhang <sup>5</sup>, Feifei Wei <sup>1</sup>, Xiaoke Zheng <sup>1</sup> and Meikun Fan <sup>2,\*</sup>

<sup>1</sup> The Analysis and Testing Center, Southwest Jiaotong University, Chengdu 610031, China

<sup>2</sup> Faculty of Geosciences and Environmental Engineering, Southwest Jiaotong University

<sup>3</sup> Physical Science and Technology, Southwest Jiaotong University, Chengdu 610031, China

<sup>4</sup> Sichuan Academy of Environmental Sciences, Chengdu 610041, China

<sup>5</sup> Sichuan Zhongbiao Technology Co., Ltd., Chengdu 610052, China

\* Correspondence: mkfan@swjtu.edu.cn

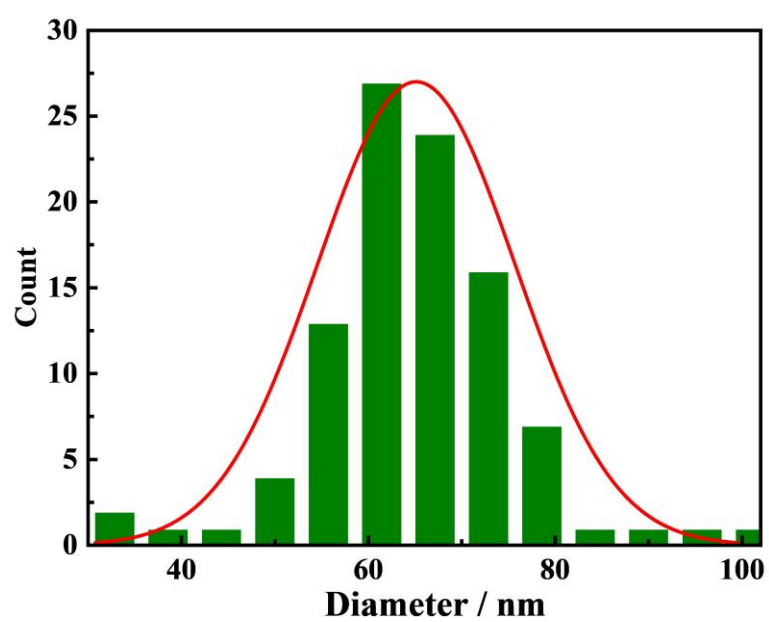

**Figure S1.** Nano measure of Ag NPs.

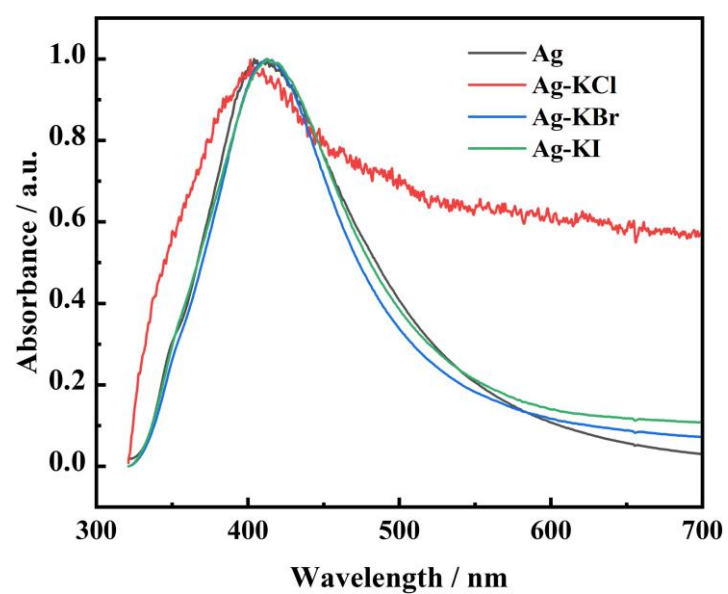

**Figure S2.** The UV spectra of Ag and the mixture of Ag NPs and 0.1 M KCl (red line), KBr (blue line) and KI (green line).

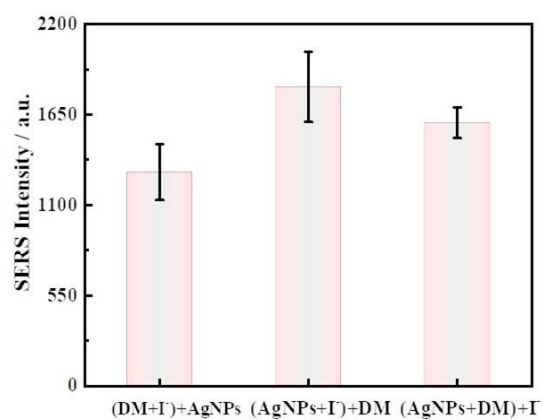

**Figure S3.** The SERS performance of different mixing orders of Ag NPs, KI and DM.

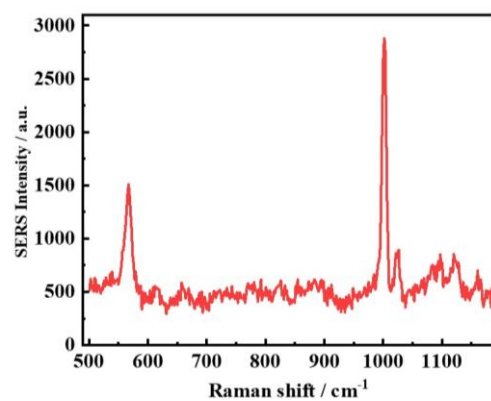

**Figure S4.** The SERS performance of commercial DM product diluted with methanol.

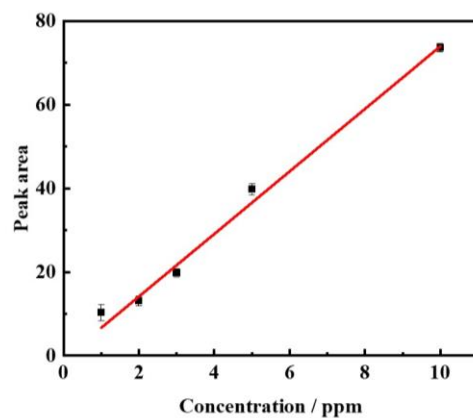

**Figure S5.** Standard curve of deltamethrin for HPLC. The concentrations of DM were 1 ppm, 2 ppm, 3 ppm, 5 ppm, 10 ppm, respectively. The fitting equation was  $y = 0.332 + 7.360 x$  ( $R^2 = 0.990$ ).

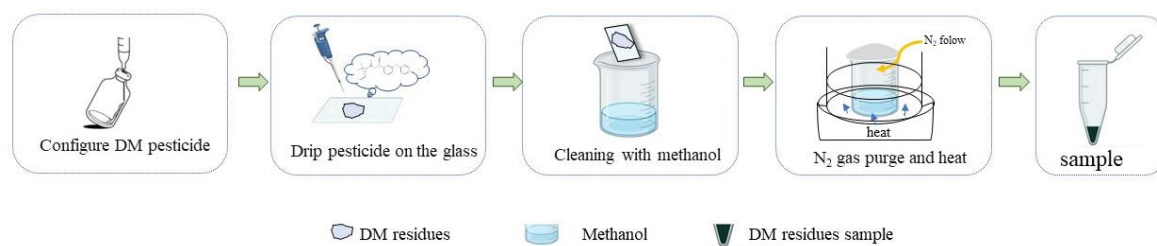

**Figure S6.** The diagram of setup for surface residue analysis.

**Table S1.** The assignment of SERS peaks of DM with Iodide assisted Ag NPs FSM sensor.

| SERS (cm <sup>-1</sup> ) | Powder(cm <sup>-1</sup> ) | Assignment                                           |
|--------------------------|---------------------------|------------------------------------------------------|
| 563                      | 563                       | $\nu(\text{C-Br})_{\text{ip}} +$                     |
| 1000                     | 999                       | $\nu_{\text{ring}} + \delta(\text{C-C})_{\text{ip}}$ |
| 1165                     | 1165                      | $\delta(\text{C-H})_{\text{ip}}$                     |
| 1207                     | 1207                      | $\nu(\text{C-C})_{\text{ip}}$                        |
| 1735                     | 1740                      | $\nu(\text{C=O})_{\text{ip}}$                        |
| 2253                     | 2254                      | $\nu(\text{C=N})_{\text{ip}}$                        |

**Table S2.** Statistical results of the SERS signal of eight Ag NPs FSMs.

| FSMs | Mean intensity | RSD (%) |
|------|----------------|---------|
| 1    | 1196.5         | 11.6    |
| 2    | 1183.5         | 11.3    |
| 3    | 1277.5         | 11.7    |
| 4    | 1360.5         | 12.7    |
| 5    | 1110           | 7.1     |
| 6    | 1199.5         | 10.9    |
| 7    | 1144.3         | 6.7     |
| 8    | 1170.5         | 4.5     |

**Table. S3** Analysis of the variance of results of SERS and HPLC method (n = 3).

| Sample | Deltamethrin<br>insecticide (ug/mL) | SS    | df | MS   | F    | P-value | F crit |
|--------|-------------------------------------|-------|----|------|------|---------|--------|
| A      | 1                                   | 49.91 | 3  | 15.9 | 3.97 | 0.16    | 8.95   |
| B      | 2.5                                 | 65.04 | 3  | 20.8 | 3.82 | 0.13    | 8.95   |
| C      | 5                                   | 89.23 | 3  | 31.2 | 1.29 | 0.41    | 8.95   |
